# Supplementary material
Source: PubMed Central journal article supplement (PMC4241446)
Supplement: mmc1.pdf [file mmc1.pdf]

Supporting Material for

**Designing cell targeted therapeutic proteins reveals the interplay between domain connectivity and cell binding**

Avi Robinson-Mosher\*<sup>1</sup>, Jan-Hung Chen\*<sup>2</sup>, Jeffrey Way<sup>1</sup>, and Pamela A. Silver<sup>1,2</sup>

\*Co-first author

<sup>1</sup>Wyss Institute for Biologically Inspired Engineering, Harvard University, Boston, MA 02115 USA

<sup>2</sup>Department of Systems Biology, Harvard Medical School, Boston, MA 02115 USA

**A**SNAP-IFN $\alpha$  (R144A)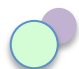IFN $\alpha$ G<sub>4</sub>S

SNAP

6xHis

Anti-CD20 scFv-SNAP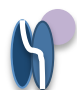V<sub>L</sub>

Linker

V<sub>H</sub>G<sub>4</sub>S

SNAP

6xHis

BG-oligonucleotides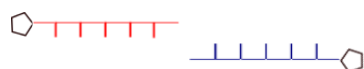**C**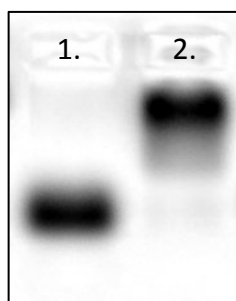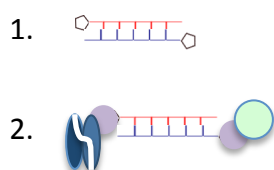**B**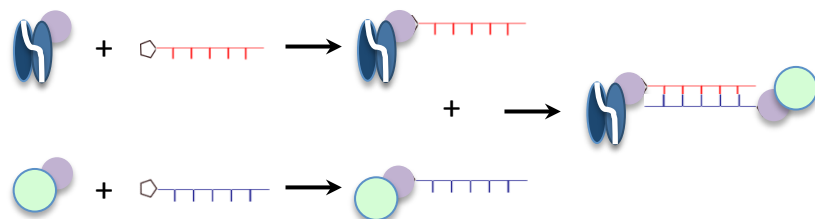

**Figure S1. Self-assembled anti-CD20 scFv-DNA-IFN $\alpha$ .** **(A)** The components of the anti-CD20 scFv-DNA-IFN $\alpha$ : SNAP-IFN $\alpha$ , anti-CD20 scFv-SNAP, and BG-modified oligonucleotides. **(B)** To assemble, SNAP-IFN $\alpha$  and anti-CD20 scFv-SNAP were first incubated with the forward and reverse strand of a BG-modified oligonucleotide pair separately. The oligonucleotide-labeled proteins were then mixed 1:1 to allow hybridization to form anti-CD20 scFv-DNA-IFN $\alpha$ . **(C)** The site-specific conjugation of SNAP-tagged protein to BG-oligonucleotide was confirmed in a gel-shift assay. When both anti-CD20 scFv-SNAP and SNAP SNAP-IFN $\alpha$  are conjugated to the DNA linker, there was a band shift (lane 2) compared to DNA linker alone.

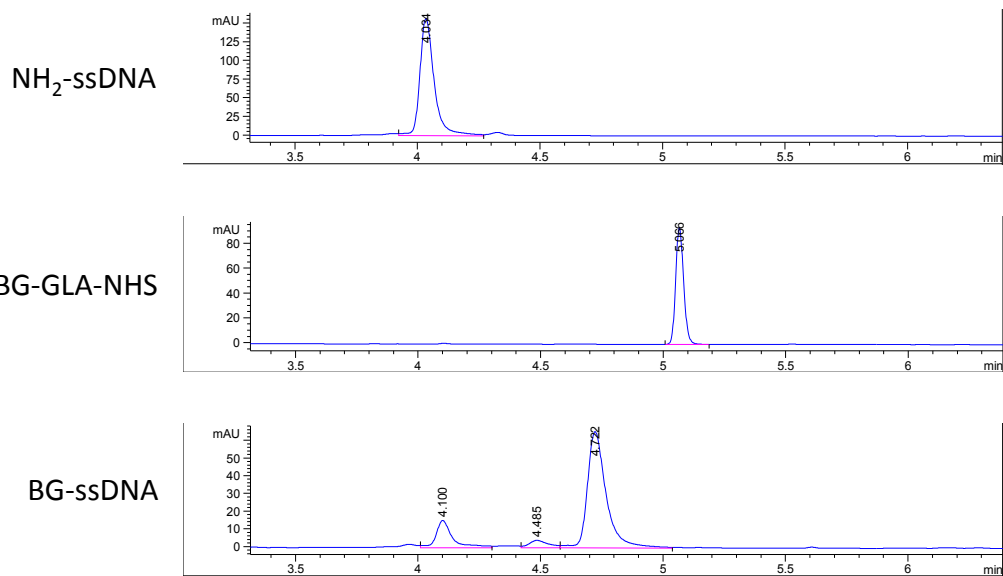

**Figure S2. Validation of the BG-DNA conjugation.** BG-GLA-NHS was conjugated to amine-modified oligonucleotides. The reaction was purified to remove excess BG-GLA-NHS. The conjugation was verified using HPLC.

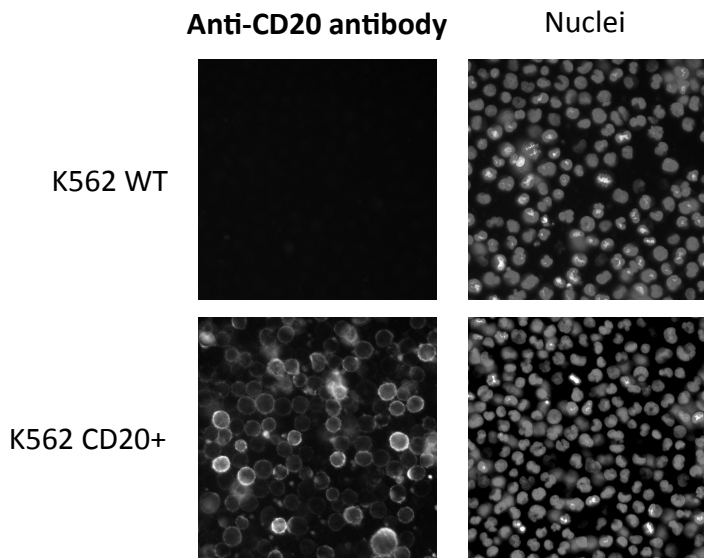

**Figure S3. Validating the expression levels of CD20 on the K562 WT and CD20+ cells.** We confirmed the membrane expression of CD20 on the K562 WT and CD20+ cell surface by immunofluorescent staining using a commercially available phycoerythrin-conjugated antibody. As expected, K562 WT did not show CD20 immunostaining, whereas the K562 CD20+ cells showed a high level of fluorescent labeling.



### **Table S1: DNA linker sequences**

|       |         |                                               |
|-------|---------|-----------------------------------------------|
| 15 bp | Forward | CAGAACAGCGACAAA                               |
|       | Reverse | TTTGTCGCTGTTCTG                               |
| 30 bp | Forward | TTGTCTCGTCTTTGTCTTGTCCCTTGCCTC                |
|       | Reverse | GAGGACAAGGACAAGACAAAGACGAGACAA                |
| 45 bp | Forward | CCTCTACTCCACTCTACCTCACTCACTACCCTACCCTACCTACCA |
|       | Reverse | TGGTAGGTAGGGTAGGGTAGTGAGTGAGGTAGAGTGGAGTAGAGG |

## Supplementary Table S2: ODE model

### Parameters used in the ODE model

| Parameter                         | Symbol         | Value                                | Source                         |
|-----------------------------------|----------------|--------------------------------------|--------------------------------|
| Cells per well                    |                | 1.5e5                                |                                |
| Well volume                       |                | 100 $\mu$ L                          |                                |
| K562 cell surface area            |                | 584 $\mu$ m <sup>2</sup>             | (1)                            |
| K562 WT cell IFNAR1 count         |                | 1062                                 | Measured by QuantiBrite        |
| K562 WT cell IFNAR2 count         |                | 3021                                 | Measured by QuantiBrite        |
| K562 WT cell CD20 count           |                | 0                                    | Measured by QuantiBrite        |
| K562 CD20+ cell IFNAR1 count      |                | 890                                  | Measured by QuantiBrite        |
| K562 CD20+ cell IFNAR2 count      |                | 2725                                 | Measured by QuantiBrite        |
| K562 CD20+ cell CD20 count        |                | 250000                               | Measured by QuantiBrite        |
| IFN WT IFNAR1 on-rate             | $k_{on}^{R1}$  | 2e5 M <sup>-1</sup> s <sup>-1</sup>  | (2)                            |
| IFN WT IFNAR1 off-rate            | $k_{off}^{R1}$ | 1 s <sup>-1</sup>                    | (2)                            |
| IFN WT IFNAR2 on-rate             | $k_{on}^{R2}$  | 3e6 M <sup>-1</sup> s <sup>-1</sup>  | (2)                            |
| IFN WT IFNAR2 off-rate            | $k_{off}^{R2}$ | 1.5e-2 s <sup>-1</sup>               | (2)                            |
| IFN WT-GS-SNAP IFNAR1 on-rate     | $k_{on}^{R1}$  | 2e5 M <sup>-1</sup> s <sup>-1</sup>  | (2)                            |
| IFN WT-GS-SNAP IFNAR1 off-rate    | $k_{off}^{R1}$ | 1 s <sup>-1</sup>                    | (2)                            |
| IFN WT-GS-SNAP IFNAR2 on-rate     | $k_{on}^{R2}$  | 2e5 M <sup>-1</sup> s <sup>-1</sup>  | Estimated by fit to experiment |
| IFN WT-GS-SNAP IFNAR2 off-rate    | $k_{off}^{R2}$ | 1.5e-2 s <sup>-1</sup>               | (2)                            |
| IFN R144A-GS-SNAP IFNAR1 on-rate  | $k_{on}^{R1}$  | 2e5 M <sup>-1</sup> s <sup>-1</sup>  | (2)                            |
| IFN R144A-GS-SNAP IFNAR1 off-rate | $k_{off}^{R1}$ | 1 s <sup>-1</sup>                    | (2)                            |
| IFN R144A-GS-SNAP IFNAR2 on-rate  | $k_{on}^{R2}$  | 4e4 M <sup>-1</sup> s <sup>-1</sup>  | Estimated by fit to experiment |
| IFN R144A-GS-SNAP IFNAR2 off-rate | $k_{off}^{R2}$ | 5e-2 s <sup>-1</sup>                 | (2)                            |
| Anti-CD20 scFv CD20 on-rate       | $k_{on}^{CD}$  | 1e4 M <sup>-1</sup> s <sup>-1</sup>  | Estimated by model fit         |
| Anti-CD20 scFv CD20 off-rate      | $k_{off}^{CD}$ | 1e-2 s <sup>-1</sup>                 | Estimated by model fit         |
| IFNAR1 diffusion coefficient      | $k_D^{R1}$     | 1e-8 mm <sup>2</sup> s <sup>-1</sup> | (3)                            |
| IFNAR2 diffusion coefficient      | $k_D^{R2}$     | 1e-8 mm <sup>2</sup> s <sup>-1</sup> | (3)                            |
| CD20 diffusion coefficient        | $k_D^{CD}$     | 1e-8 mm <sup>2</sup> s <sup>-1</sup> | (3)                            |
| Non-signaling endocytosis rate    | $k_e^{NS}$     | 9.625e-5 s <sup>-1</sup>             | (4)                            |
| Signaling endocytosis rate        | $k_e^S$        | 7.8e-4 s <sup>-1</sup>               | (5)                            |

## ODE model transitions

The states tracked in the ODE model are

| State                             | Symbol         |
|-----------------------------------|----------------|
| Unbound chimeric activator or IFN | $F_A$          |
| Unbound CD20                      | $F_{CD}$       |
| Unbound IFNAR1                    | $F_{R1}$       |
| Unbound IFNAR2                    | $F_{R2}$       |
| CD20-bound CA                     | $B_C$          |
| IFNAR1-bound CA                   | $B_{R1}$       |
| IFNAR2-bound CA                   | $B_{R2}$       |
| CD20-IFNAR1-bound CA              | $B_{CD,R1}$    |
| CD20-IFNAR2-bound CA              | $B_{CD,R2}$    |
| IFNAR1-IFNAR2-bound CA            | $B_{R1,R2}$    |
| CD20-IFNAR1-IFNAR2-bound CA       | $B_{CD,R1,R2}$ |

All of the reactions that compose the ODE are contained in the table below. All rates of the form “ $k_{on}^{CD|R2}$ ” are calculated according to (3), equation (4-37a), and all rates of the form “ $k_{off}^{CD|R2}$ ” are calculated according to (3), equation (4-38). “ $k_{on}^{CD|R2}$ ” should be read as “the on-rate of binding to CD20 given that the complex is already bound to IFNAR2” and “ $k_{off}^{CD|R2}$ ” should be read as “the rate of complete dissociation from CD20 given that the complex is bound to IFNAR2 and CD20.” A state of the form “ $B_{CD,R1}$ ” indicates “chimeric activator bound to both CD20 and IFNAR1.”

| Reactants           | Products         | Rate              |
|---------------------|------------------|-------------------|
| $F_A, F_{CD}$       | $B_{CD}$         | $k_{on}^{CD}$     |
| $F_A, F_{R1}$       | $B_{R1}$         | $k_{on}^{R1}$     |
| $F_A, F_{R2}$       | $B_{R2}$         | $k_{on}^{R2}$     |
| $F_{CD}, B_{R1}$    | $B_{CD,R1}$      | $k_{on}^{CD R1}$  |
| $F_{CD}, B_{R2}$    | $B_{CD,R2}$      | $k_{on}^{CD R2}$  |
| $F_{R1}, B_{R2}$    | $B_{R1,R2}$      | $k_{on}^{R1 R2}$  |
| $B_{R1}, F_{R2}$    | $B_{R1,R2}$      | $k_{on}^{R2 R1}$  |
| $B_{CD}, F_{R1}$    | $B_{CD,R1}$      | $k_{on}^{R1 CD}$  |
| $B_{CD}, F_{R2}$    | $B_{CD,R2}$      | $k_{on}^{R2 CD}$  |
| $F_{CD}, B_{R1,R2}$ | $B_{CD,R1,R2}$   | $k_{on}^{CD R2}$  |
| $F_{R1}, B_{CD,R2}$ | $B_{CD,R1,R2}$   | $k_{on}^{R1 R2}$  |
| $F_{R2}, B_{CD,R1}$ | $B_{CD,R1,R2}$   | $k_{on}^{R2 R1}$  |
| $B_{CD}$            | $F_{CD}, F_A$    | $k_{off}^{CD}$    |
| $B_{R1}$            | $F_{R1}, F_A$    | $k_{off}^{R1}$    |
| $B_{R2}$            | $F_{R2}, F_A$    | $k_{off}^{R2}$    |
| $B_{CD,R1}$         | $F_{CD}, B_{R1}$ | $k_{off}^{CD R1}$ |
| $B_{CD,R1}$         | $F_{R1}, B_{CD}$ | $k_{off}^{R1 CD}$ |
| $B_{CD,R2}$         | $F_{CD}, B_{R2}$ | $k_{off}^{CD R2}$ |

|                |                     |                   |
|----------------|---------------------|-------------------|
| $B_{CD,R2}$    | $F_{R2}, B_{CD}$    | $k_{off}^{R2 CD}$ |
| $B_{R1,R2}$    | $F_{R1}, B_{R2}$    | $k_{off}^{R1 R2}$ |
| $B_{R1,R2}$    | $F_{R2}, B_{R1}$    | $k_{off}^{R2 R1}$ |
| $B_{CD,R1,R2}$ | $F_{CD}, B_{R1,R2}$ | $k_{off}^{CD R2}$ |
| $B_{CD,R1,R2}$ | $F_{R1}, B_{CD,R2}$ | $k_{off}^{R1 R2}$ |
| $B_{CD,R1,R2}$ | $F_{R2}, B_{CD,R1}$ | $k_{off}^{R2 R1}$ |
| $B_{CD}$       | None                | $k_e^{NS}$        |
| $B_{R1}$       | None                | $k_e^{NS}$        |
| $B_{R2}$       | None                | $k_e^{NS}$        |
| $B_{CD,R1}$    | None                | $k_e^{NS}$        |
| $B_{CD,R2}$    | None                | $k_e^{NS}$        |
| $B_{R1,R2}$    | None                | $k_e^S$           |
| $B_{CD,R1,R2}$ | None                | $k_e^S$           |

### State transitions in the form of ordinary differential equations

$$\frac{dF_A}{dt} = B_{CD}k_{off}^{CD} + B_{R1}k_{off}^{R1} + B_{R2}k_{off}^{R2} - F_A F_{CD}k_{on}^{CD} - F_A F_{R1}k_{on}^{R1} - F_A F_{R2}k_{on}^{R2}$$

$$\begin{aligned} \frac{dF_{CD}}{dt} = & B_{CD}k_{off}^{CD} + B_{CD,R1}k_{off}^{CD|R1} + B_{CD,R2}k_{off}^{CD|R2} + B_{CD,R1,R2}k_{off}^{CD|R2} - F_{CD}F_Ak_{on}^{CD} \\ & - F_{CD}B_{R1}k_{on}^{CD|R1} - F_{CD}B_{R2}k_{on}^{CD|R2} - F_{CD}B_{R1,R2}k_{on}^{CD|R2} \end{aligned}$$

$$\begin{aligned} \frac{dF_{R1}}{dt} = & B_{R1}k_{off}^{R1} + B_{CD,R1}k_{off}^{R1|CD} + B_{R1,R2}k_{off}^{R1|R2} + B_{CD,R1,R2}k_{off}^{R1|R2} - F_{R1}F_Ak_{on}^{R1} \\ & - F_{R1}B_{CD}k_{on}^{R1|CD} - F_{R1}B_{R2}k_{on}^{R1|R2} - F_{R1}B_{CD,R2}k_{on}^{R1|R2} \end{aligned}$$

$$\begin{aligned} \frac{dF_{R2}}{dt} = & B_{R2}k_{off}^{R2} + B_{CD,R2}k_{off}^{R2|CD} + B_{R1,R2}k_{off}^{R2|R1} + B_{CD,R1,R2}k_{off}^{R2|R1} - F_{R2}F_Ak_{on}^{R2} \\ & - F_{R2}B_{CD}k_{on}^{R2|CD} - F_{R2}B_{R1}k_{on}^{R2|R1} - F_{R2}B_{CD,R1}k_{on}^{R2|R1} \end{aligned}$$

$$\begin{aligned} \frac{B_{CD}}{dt} = & F_{CD}F_Ak_{on}^{CD} + B_{CD,R1}k_{off}^{CD|R1} + B_{CD,R2}k_{off}^{CD|R2} - B_{CD}k_{off}^{CD} - B_{CD}F_{R1}k_{on}^{R1|CD} \\ & - B_{CD}F_{R2}k_{on}^{R2|CD} - B_{CD}k_e^{NS} \end{aligned}$$

$$\begin{aligned} \frac{B_{R1}}{dt} = & F_{R1}F_Ak_{on}^{R1} + B_{CD,R1}k_{off}^{R1|CD} + B_{R1,R2}k_{off}^{R1|R2} - B_{R1}k_{off}^{R1} - B_{R1}F_{CD}k_{on}^{CD|R1} \\ & - B_{R1}F_{R2}k_{on}^{R2|R1} - B_{R1}k_e^{NS} \end{aligned}$$

$$\begin{aligned} \frac{B_{R2}}{dt} = & F_{R2}F_Ak_{on}^{R2} + B_{CD,R2}k_{off}^{R2|CD} + B_{R1,R2}k_{off}^{R2|R1} - B_{R2}k_{off}^{R2} - B_{R2}F_{CD}k_{on}^{CD|R2} \\ & - B_{R2}F_{R1}k_{on}^{R1|R2} - B_{R2}k_e^{NS} \end{aligned}$$

$$\begin{aligned} \frac{B_{CD,R1}}{dt} = & B_{CD}F_{R1}k_{on}^{R1|CD} + B_{R1}F_{CD}k_{on}^{CD|R1} + B_{CD,R1,R2}k_{off}^{R2|R1} - B_{CD,R1}k_{off}^{CD|R1} \\ & - B_{CD,R1}k_{off}^{R1|CD} - B_{CD,R1}F_{R2}k_{on}^{R2|R1} - B_{CD,R1}k_e^{NS} \end{aligned}$$

$$\begin{aligned} \frac{B_{CD,R2}}{dt} = & B_{CD}F_{R2}k_{on}^{R2|CD} + B_{R2}F_{CD}k_{on}^{CD|R2} + B_{CD,R1,R2}k_{off}^{R1|R2} - B_{CD,R2}k_{off}^{CD|R2} \\ & - B_{CD,R2}k_{off}^{R2|CD} - B_{CD,R2}F_{R1}k_{on}^{R1|R2} - B_{CD,R2}k_e^{NS} \end{aligned}$$

$$\begin{aligned}\frac{B_{R1,R2}}{dt} &= B_{R1}F_{R2}k_{on}^{R2|R1} + B_{R2}F_{R1}k_{on}^{R1|R2} + B_{CD,R1,R2}k_{off}^{CD|R2} - B_{R1,R2}k_{off}^{R1|R2} \\ &\quad - B_{R1,R2}k_{off}^{R2|R1} - B_{R1,R2}F_{CD}k_{on}^{CD|R2} - B_{R1,R2}k_e^S \\ \frac{B_{CD,R1,R2}}{dt} &= B_{CD,R1}F_{R2}k_{off}^{R2|R1} + B_{CD,R2}F_{R1}k_{on}^{R1|R2} + B_{R1,R2}F_{CD}k_{on}^{CD|R2} - B_{CD,R1,R2}k_{off}^{CD|R2} \\ &\quad - B_{CD,R1,R2}k_{off}^{R1|R2} - B_{CD,R1,R2}k_{off}^{R2|R1} - B_{CD,R1,R2}k_e^S\end{aligned}$$

## Supporting References

1. Williams, T.E., S. Nagarajan, P. Selvaraj, and C. Zhu. 2000. Concurrent and Independent Binding of Fcγ Receptors IIa and IIIb to Surface-Bound IgG. *Biophysical Journal*. 79: 1867–1875.
2. Jaks, E., M. Gavutis, G. Uzé, J. Martal, and J. Piehler. 2007. Differential receptor subunit affinities of type I interferons govern differential signal activation. *Journal of Molecular Biology*. 366: 525–539.
3. Lauffenburger, D.A., and J.J. Linderman. 1996. *Receptors: Models for Binding, Trafficking, and Signaling*. Oxford University Press on Demand.
4. Beum, P.V., E.M. Peek, M.A. Lindorfer, F.J. Beurskens, P.J. Engelberts, P.W.H.I. Parren, J.G.J. van de Winkel, and R.P. Taylor. 2011. Loss of CD20 and Bound CD20 Antibody from Opsonized B Cells Occurs More Rapidly Because of Trogocytosis Mediated by Fc Receptor-Expressing Effector Cells Than Direct Internalization by the B Cells. *The Journal of Immunology*. 187: 3438–3447.
5. Dunne, S.L., Z. Bajzer, and S. Vuk-Pavlović. 1990. Kinetics of receptor-mediated uptake and processing of interferon-alpha 2a and tumor necrosis factor-alpha by human tumor cells. *Growth Factors*. 2: 167–177.
